# Supplementary material for: Characteristics of total gaseous mercury (TGM) concentrations in anindustrial complex in South Korea: impacts from local sources
Source: Copernicus journal article supplement (doi:10.5194/acp-16-10215-2016), 2016-08-11
Supplement: Supplementary file 1 [file acp-16-10215-2016-supplement.pdf]

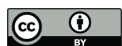

*Supplement of*

## **Characteristics of total gaseous mercury (TGM) concentrations in an industrial complex in South Korea: impacts from local sources**

**Yong-Seok Seo et al.**

*Correspondence to:* Seung-Muk Yi ([yiseung@snu.ac.kr](mailto:yiseung@snu.ac.kr))

The copyright of individual parts of the supplement might differ from the CC-BY 3.0 licence.

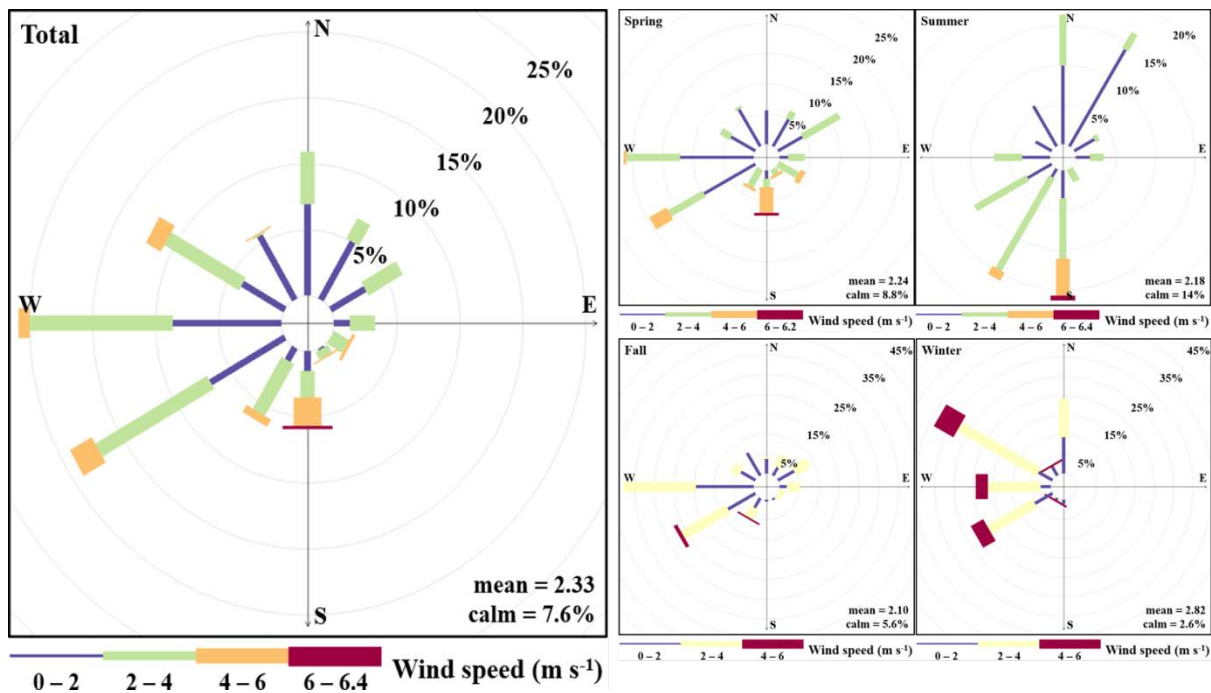

**Fig. S1. Frequency of counts of measured wind direction occurrence by season in this study.**

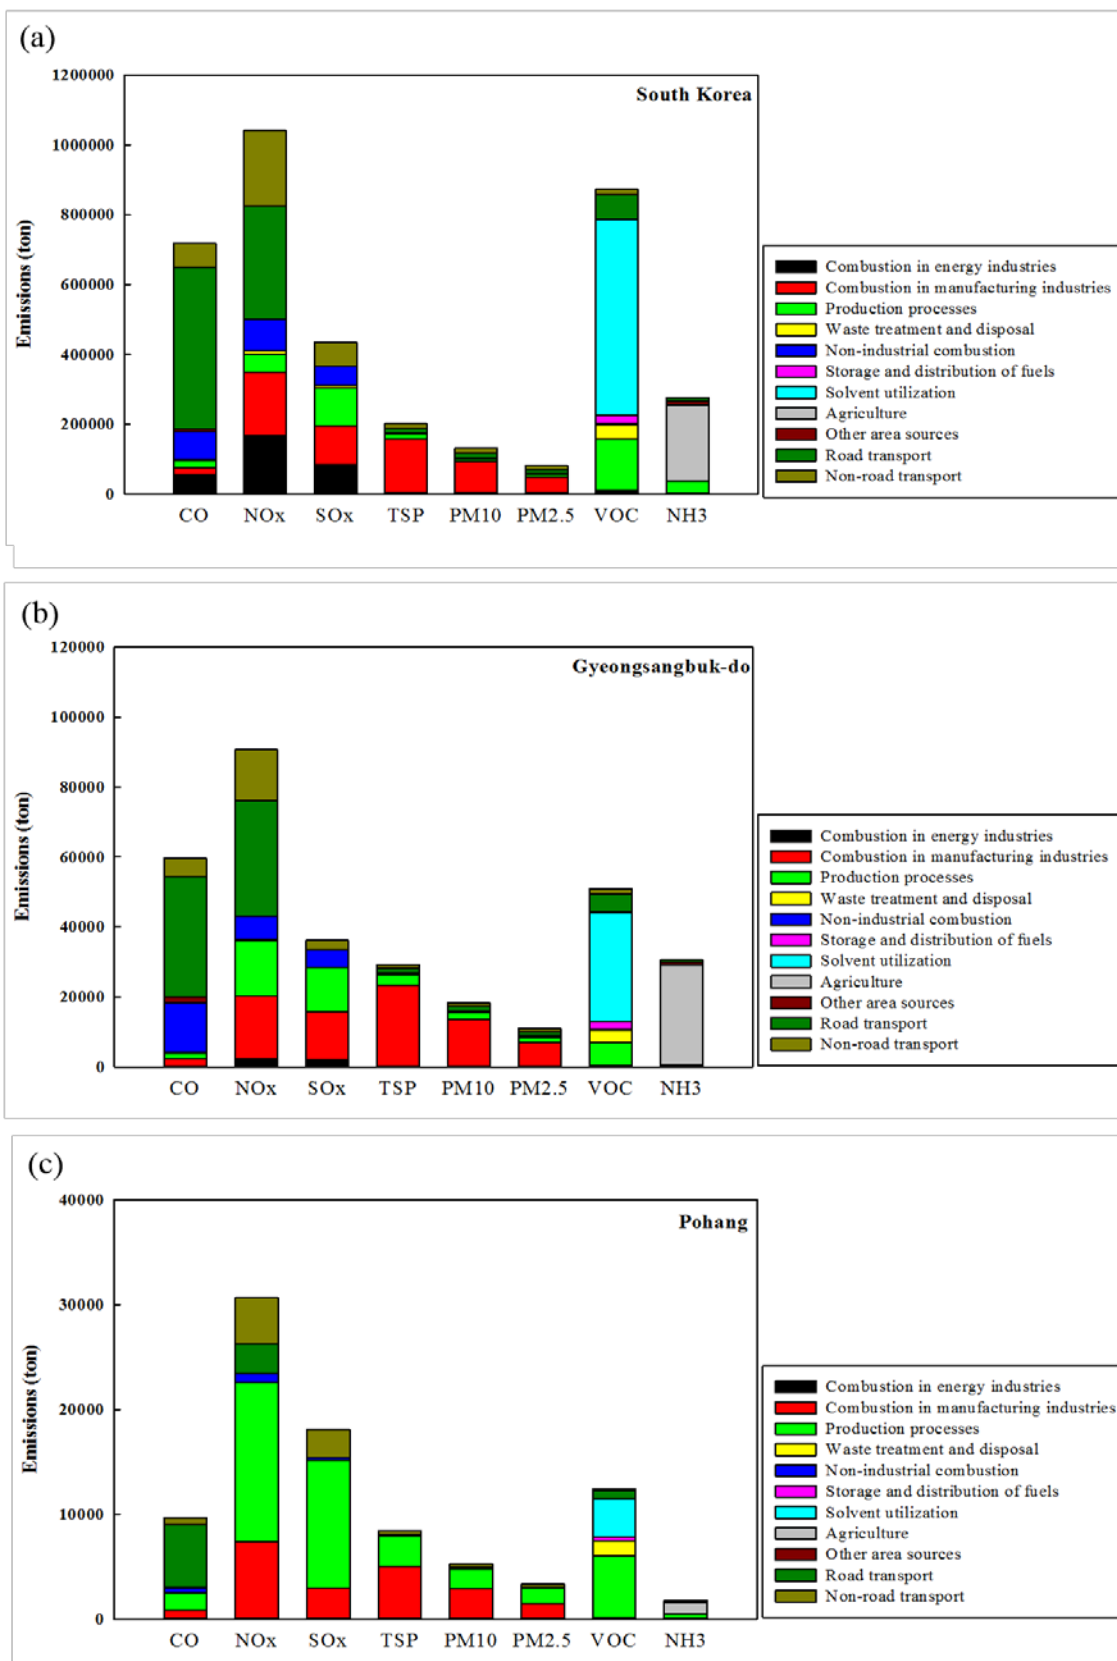

**Fig. S2. Sectoral contribution of emissions of (a) South Korea, (b) Gyeongsangbuk-do and (c) Pohang for CO, NOx, SOx, TSP VOC and NH<sub>3</sub>.**

## Sectoral contribution of emissions

In South Korea, the NO<sub>x</sub> emissions were highest, followed by VOC, CO, SO<sub>x</sub>, NH<sub>3</sub>, TSP, PM<sub>10</sub> and PM<sub>2.5</sub> (**Fig. S2(a)**). In Gyeongsangbuk-do, the NO<sub>x</sub> emissions were highest, followed by CO, VOC, SO<sub>x</sub>, NH<sub>3</sub>, and TSP, PM<sub>10</sub> and PM<sub>2.5</sub> which is similar trend to South Korea (**Fig. S2(b)**). However, Pohang showed a different pattern with the highest NO<sub>x</sub> emissions, followed by SO<sub>x</sub>, VOC, CO, TSP, PM<sub>10</sub>, PM<sub>2.5</sub> and NH<sub>3</sub> (**Fig. S2(c)**).

Point source (combustion in energy industries + combustion in manufacturing industries + production processes + waste treatment and disposal) in South Korea accounted for 1,226,609 tons (34.6% of total emissions in South Korea) of the air pollutants. Gyeongsangbuk-do has a similar trend with 106,439 tons (35.8% of total emissions in Gyeongsangbuk-do) of the air pollutants. However, Pohang has a significantly high contribution with 56,144 tons (69.2% of total emissions in Pohang) of the air pollutants.

Area source (non-industrial combustion + storage and distribution of fuels + solvent utilization + agriculture + other area sources) in South Korea accounted for 1,055,461 tons (29.8% of total emissions in South Korea) of the air pollutants. Gyeongsangbuk-do has a similar trend with 90,982 tons (30.6% of total emissions in Gyeongsangbuk-do) of the air pollutants. However, Pohang has a less contribution with 6,903 tons (8.5% of total emissions in Pohang) of the air pollutants.

Mobile source (road transport + non-road transport) in South Korea accounted for 1,261,782 tons (35.6% of total emissions in South Korea) of the air pollutants. Gyeongsangbuk-do has a similar contribution with 99,709 tons (33.6% of total emissions in Gyeongsangbuk-do) of the air pollutants. Pohang also has a lower contribution with 18,048 tons (22.3% of total emissions in Pohang) of the air pollutants.

**Table S1. Source Classification Categories (SCC) in CAPSS. The fugitive dust and biomass were excluded.**

| <b>Emission characteristics</b> | <b>SCC1 (11)</b>                              | <b>SCC2 (42)</b>                                                                                                                                                                                                                                                                                                                        | <b>SCC3 (173)</b> |
|---------------------------------|-----------------------------------------------|-----------------------------------------------------------------------------------------------------------------------------------------------------------------------------------------------------------------------------------------------------------------------------------------------------------------------------------------|-------------------|
| <b>Point source</b>             | <b>Combustion in energy industries</b>        | - Public power<br>- District heating plants<br>- Petroleum refining plants<br>- Commercial power                                                                                                                                                                                                                                        | 4                 |
|                                 | <b>Combustion in manufacturing industries</b> | - Process furnace<br>- Combustion plants<br>- Other                                                                                                                                                                                                                                                                                     | 44                |
|                                 | <b>Production processes</b>                   | - Processes in other industries<br>- Processes in wood, paper and pulp industries<br>- Processes in inorganic chemical industries<br>- Processes in petroleum industries<br>- Processes in food and drink industries<br>- Ammonia consumption<br>- Processes in organic chemical industries<br>- Processes in iron and steel industries | 44                |
|                                 | <b>Waste treatment and disposal</b>           | - Waste incineration<br>- Other waste treatment                                                                                                                                                                                                                                                                                         | 5                 |
| <b>Area source</b>              | <b>Non-industrial combustion</b>              | - Commercial and institutional plants<br>- Plants in agriculture, forestry and aquaculture<br>- Residential plants                                                                                                                                                                                                                      | 5                 |
|                                 | <b>Storage and distribution of fuels</b>      | - Gasoline distribution                                                                                                                                                                                                                                                                                                                 | 3                 |
|                                 | <b>Solvent utilization</b>                    | - Paint application<br>- Electronic Degreaser<br>- Dry cleaning<br>- Other use of solvents and related activities                                                                                                                                                                                                                       | 15                |
|                                 | <b>Agriculture</b>                            | - Enteric fermentation<br>- Cultures with fertilizers                                                                                                                                                                                                                                                                                   | 10                |
|                                 | <b>Other area sources</b>                     | - Forest and other vegetation fires<br>- Animals                                                                                                                                                                                                                                                                                        | 3                 |
| <b>Mobile source</b>            | <b>Road transport</b>                         | - Passenger cars<br>- Light-duty vehicles<br>- Recreational vehicles<br>- Taxis<br>- Buses<br>- Special purpose vehicles<br>- Trucks<br>- Motorcycles                                                                                                                                                                                   | 18                |
|                                 | <b>Non-road transport</b>                     | - Construction machinery and equipment<br>- Agricultural machinery<br>- Ships<br>- Railways<br>- Aircrafts                                                                                                                                                                                                                              | 22                |

\*The numbers represent the number of sources.

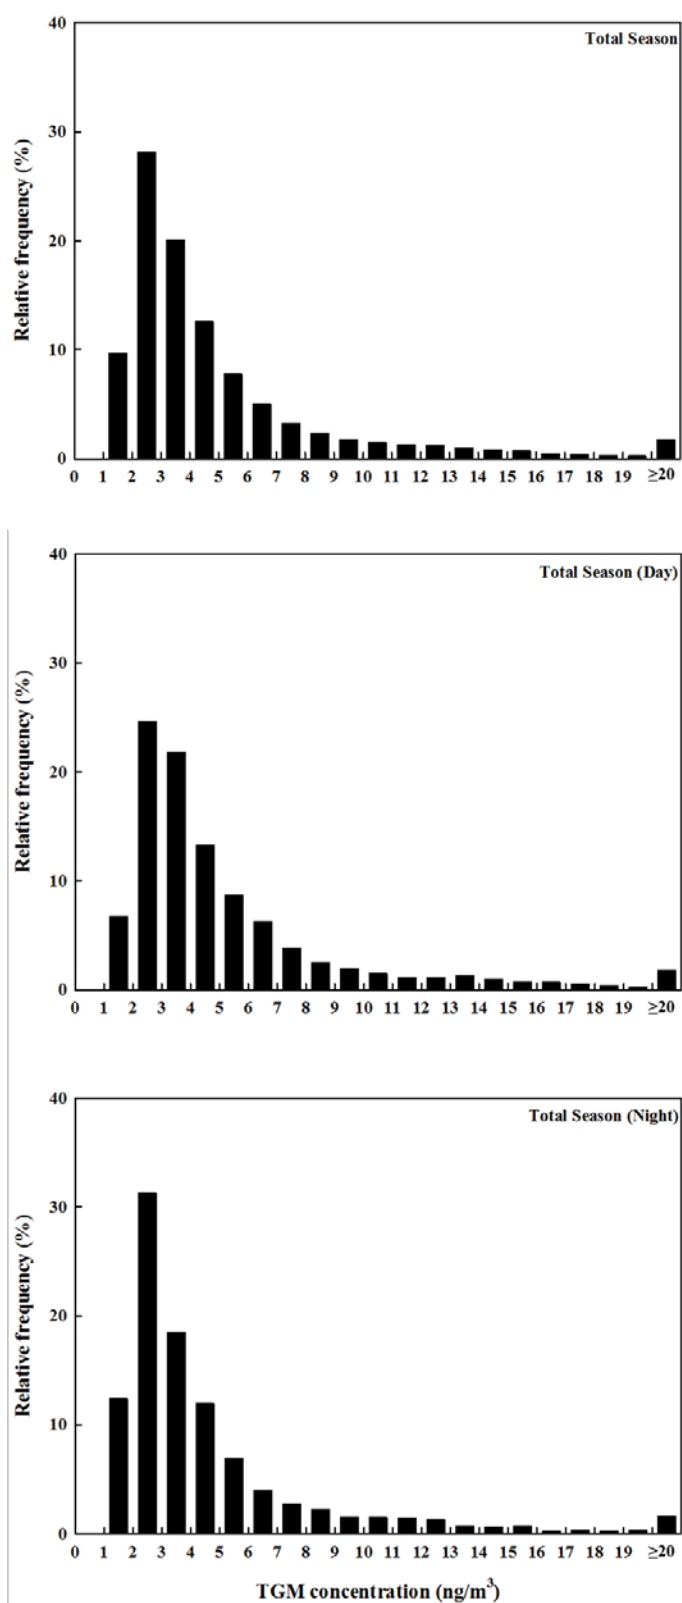

**Fig. S3.** Frequency distribution of TGM during sampling period. Note that TGM was measured every 5-min.

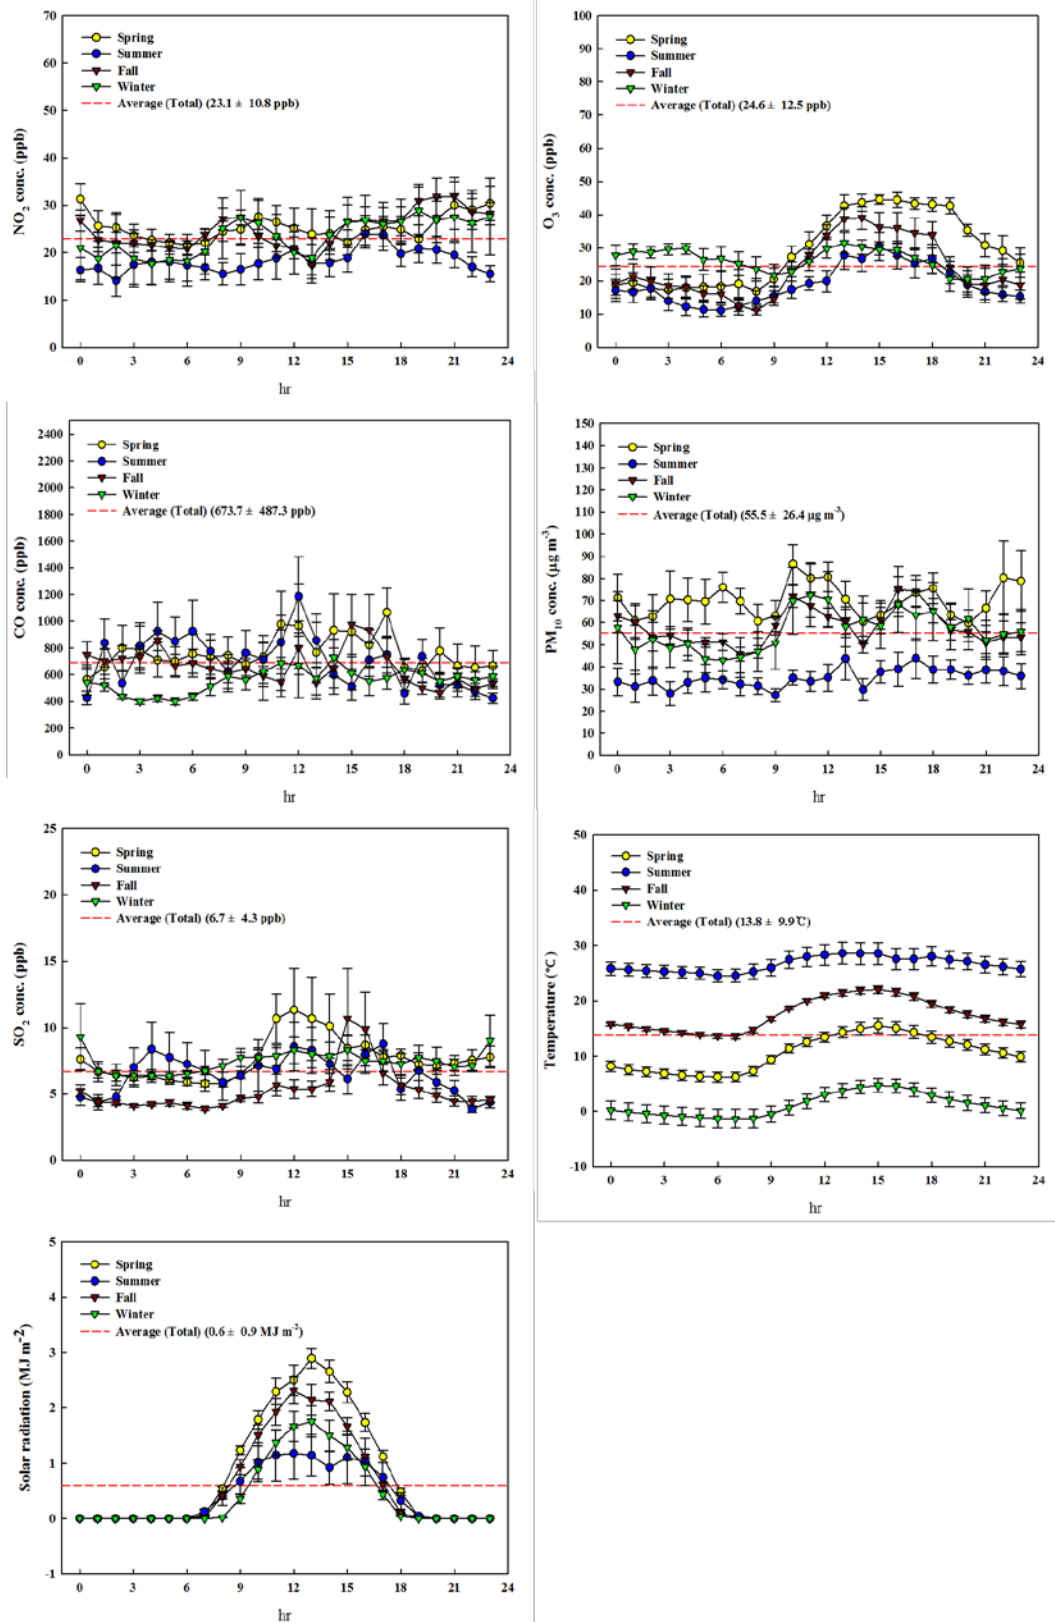

**Fig. S4.** The diurnal variations of co-pollutants concentrations and meteorological data during the sampling periods. The error bars represent standard error.

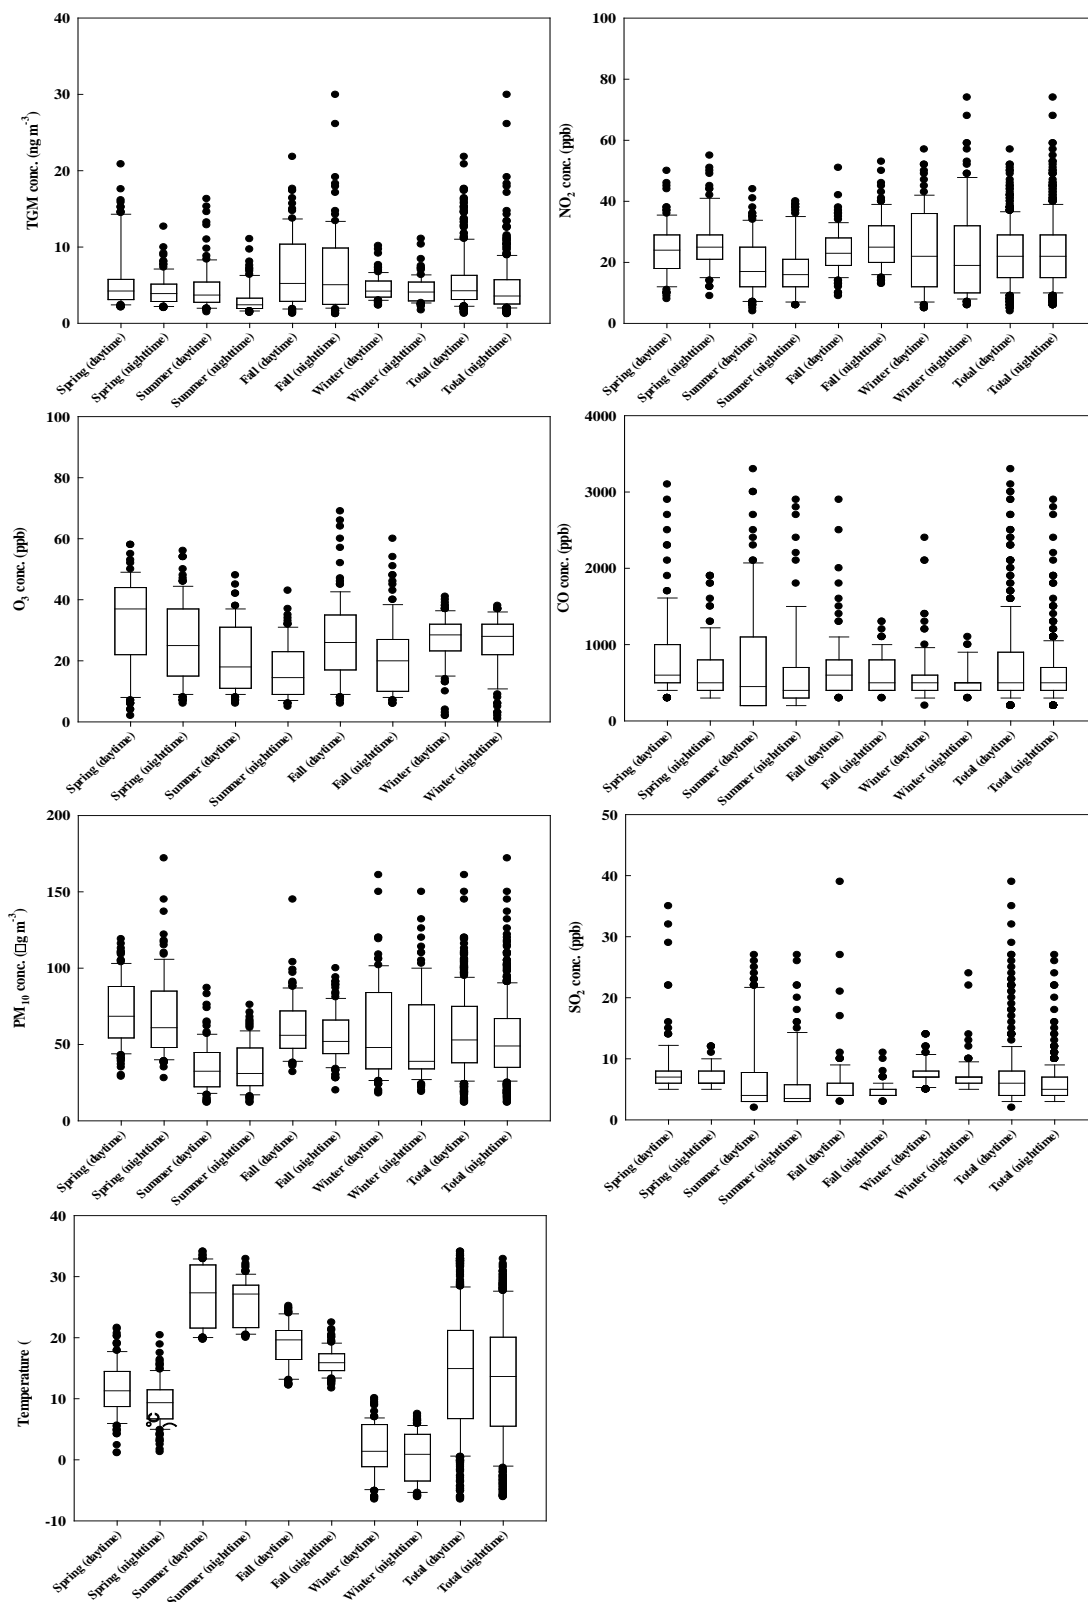

**Fig. S5. Comparison of TGM, co-pollutants and meteorological data between daytime and nighttime. Note that TGM was presented with hourly average concentration.**

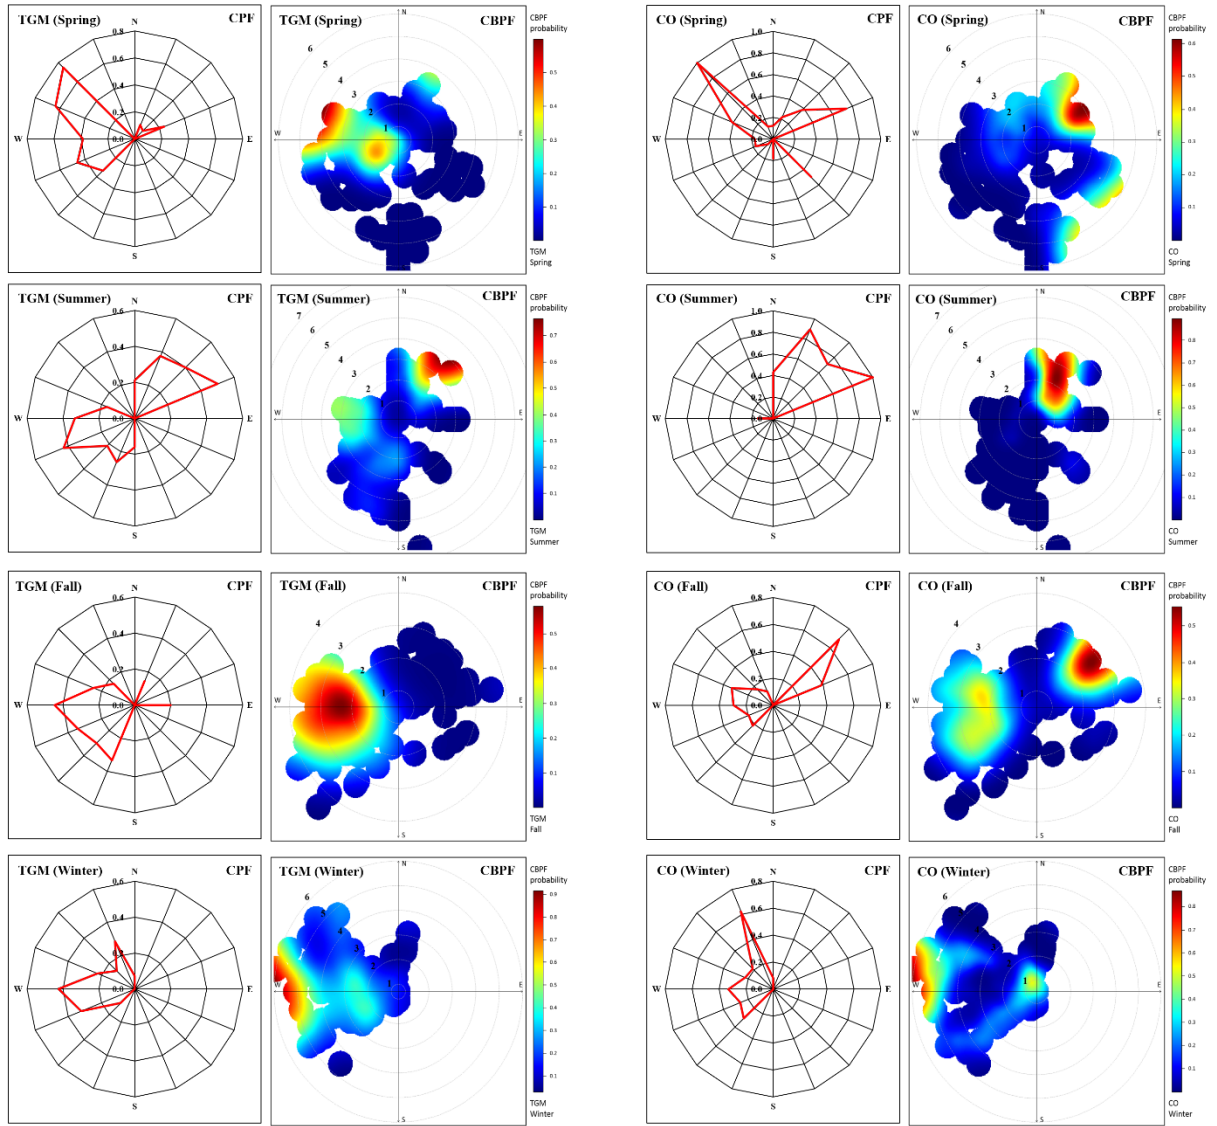

**Fig. S6. Comparisons of CPF and CBPF plots for TGM and CO higher than average concentration. The radial axes of CPF and CBPF are the probability and the wind speed ( $\text{m s}^{-1}$ ), respectively.**
